# Supplementary material for: Oncogenesis of T-ALL and nonmalignant consequences of overexpressing intracellular NOTCH1
Source: PubMed Central journal article supplement — J Exp Med. 2008 Nov 24;205(12):2851–61. doi: 10.1084/jem.20081561 (PMC2585834; doi:10.1084/jem.20081561), 2008-11-24
Supplement: jem.20081561_1.pdf [file jem.20081561_1.pdf]

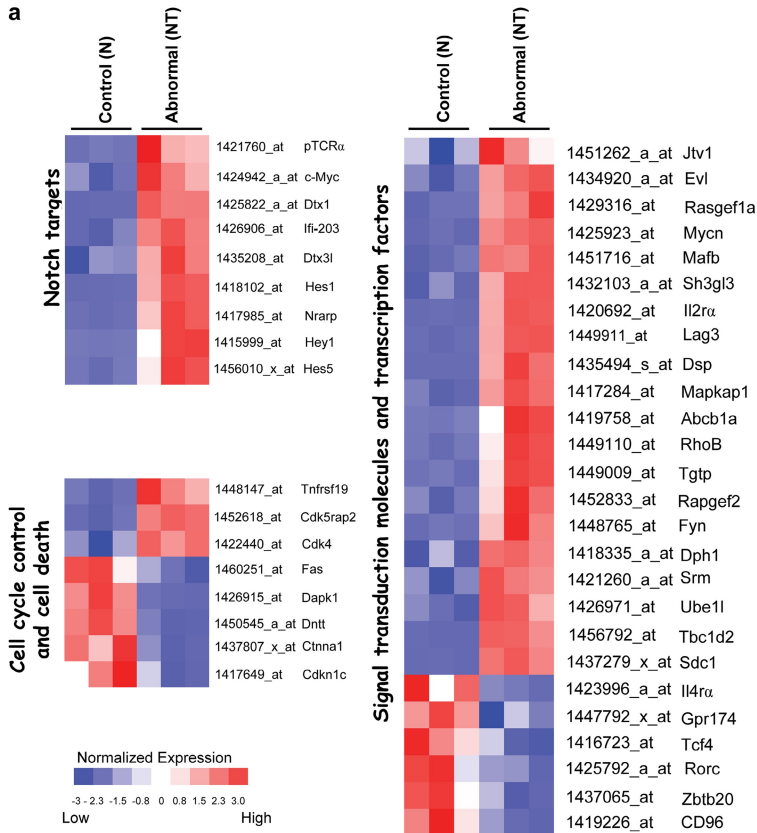

Figure S1. Global gene expression. Gene expression profiling was performed in control CD4<sup>+</sup>8<sup>+</sup> versus abnormal non-malignant ICN1-overexpressing CD4<sup>+</sup>8<sup>+</sup> cells (a) and abnormal nonmalignant versus tumor CD4<sup>+</sup>8<sup>+</sup> cells (b).

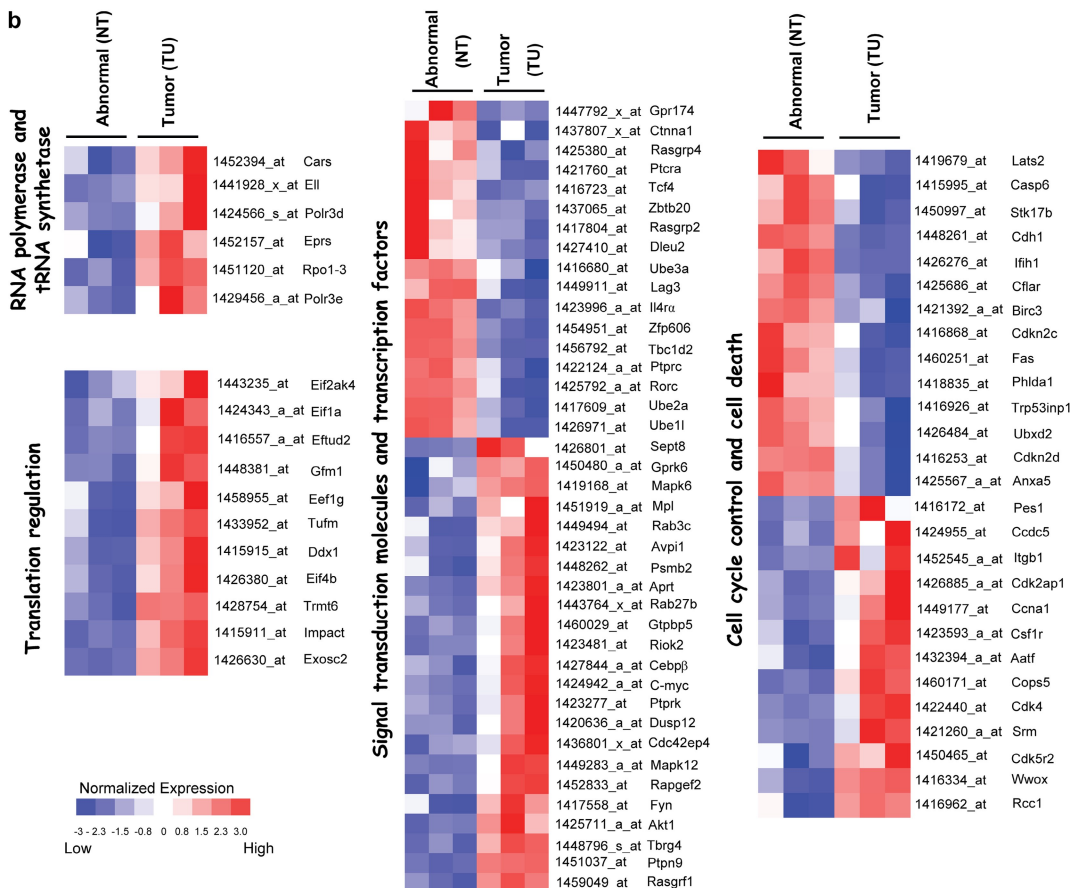

Table S1. Tumor development in nude mice

| Time after ICNI BMT | Sorted Cells (2x10 <sup>6</sup> )                   | Post injection in nude recipient mice | Tumor Development |
|---------------------|-----------------------------------------------------|---------------------------------------|-------------------|
| <b>2 weeks</b>      | GFP <sup>+</sup> /DP                                | 2wk                                   | —                 |
|                     |                                                     | 2mo                                   | —                 |
|                     |                                                     | 6mo                                   | —                 |
| <b>6 weeks</b>      | GFP <sup>+</sup> /DP                                | 2wk                                   | +                 |
|                     |                                                     | 3.5wk                                 | +                 |
|                     | GFP <sup>+</sup> /CD4 <sup>-</sup> CD8 <sup>+</sup> | 2wk                                   | +                 |
|                     |                                                     | 3.5wk                                 | +                 |
| <b>8 weeks</b>      | GFP <sup>+</sup> /DP                                | 2wk                                   | +                 |
|                     |                                                     | 3.5wk                                 | +                 |
|                     | GFP <sup>+</sup> /CD4 <sup>-</sup> CD8 <sup>+</sup> | 2wk                                   | +                 |
|                     |                                                     | 3.5wk                                 | +                 |

Tumorigenicity assays in nu/nu homozygous mice. To determine which populations of GFP<sup>+</sup> cells are tumorigenic, transplantation assays were performed in nu/nu homozygous mice. 10<sup>6</sup> GFP<sup>+</sup>/CD4<sup>+</sup>8<sup>+</sup> (GFP<sup>+</sup>/DP) splenocytes at 2 wk after BMT, and 10<sup>6</sup> GFP<sup>+</sup>/DP or GFP<sup>+</sup>/CD4<sup>-</sup>8<sup>+</sup> splenocytes at 6 and 8 wk after BMT were washed, pelleted, resuspended in 200  $\mu$ l of PBS, and intraperitoneally injected into nude recipient mice. Blood samples of nude mice were analyzed by FACS, and mice were killed when displaying obvious clinical symptoms of malignancy.
